# Supplementary material
Source: bioRxiv or medRxiv preprint supplement (https://medrxiv.org/content/medrxiv/early/2024/04/02/2024.03.30.24305001/DC1/embed/media-1.pdf)
Supplement: Supplementary file [file media-1.pdf]

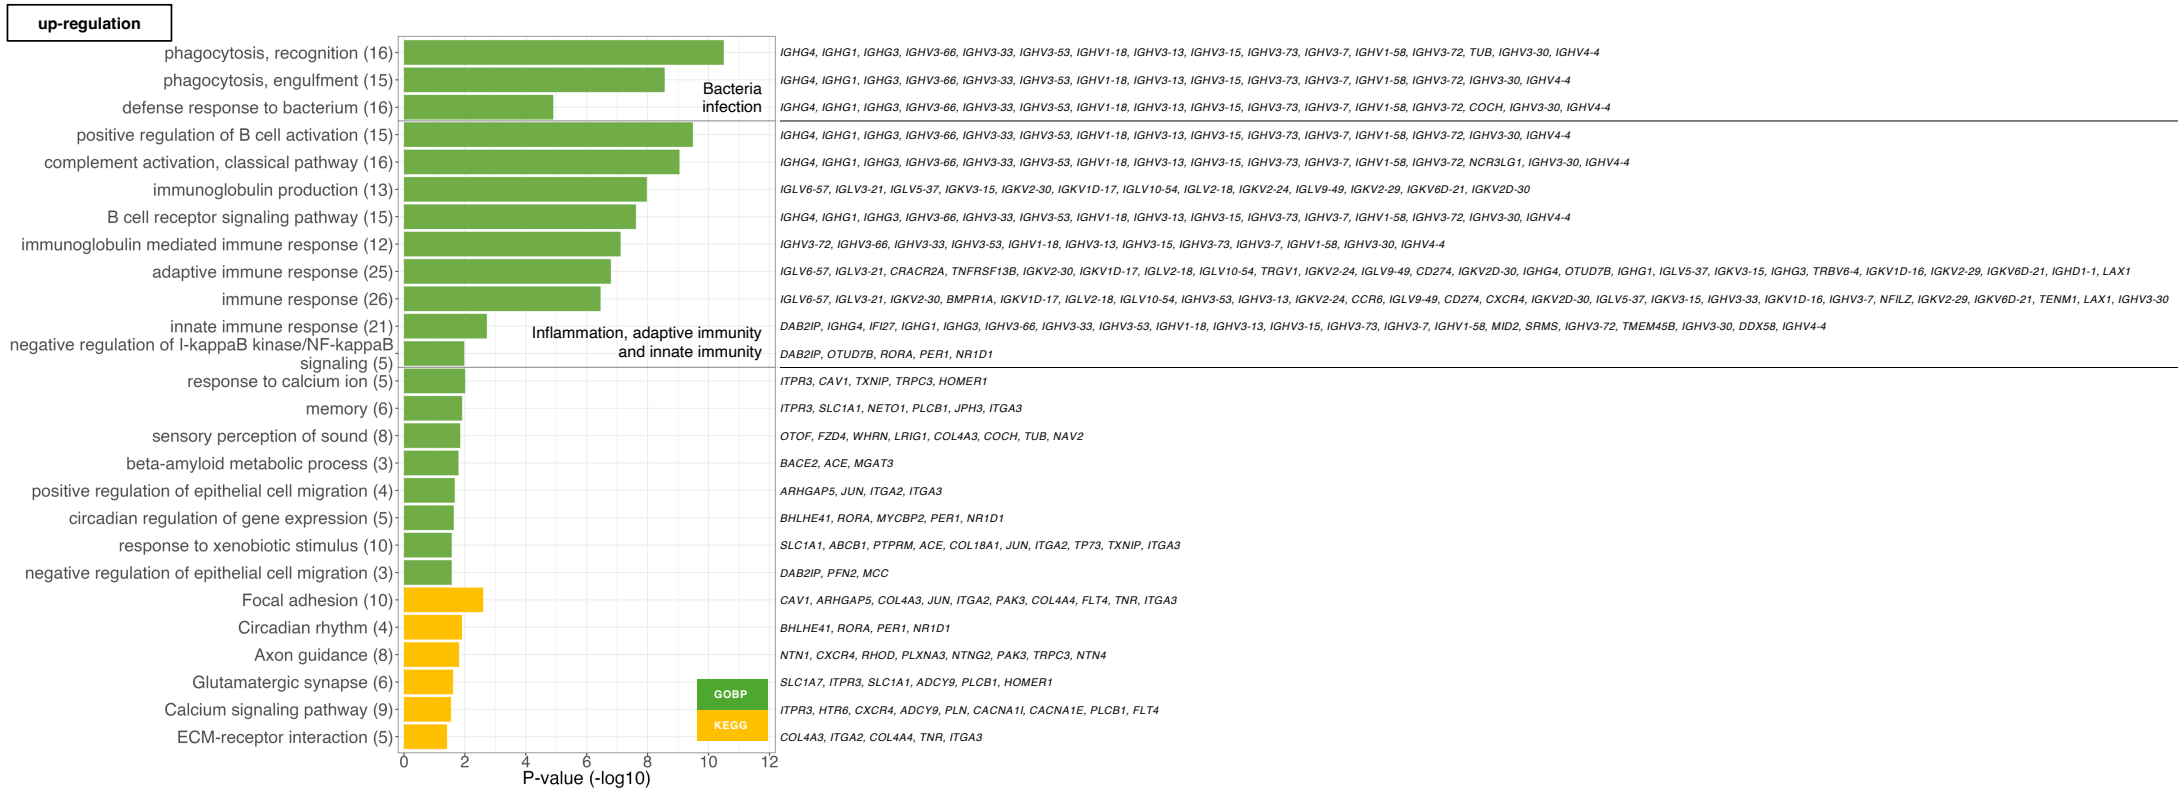

Supplementary Figure 1. Bar chart of enrichment analysis of biological process gene ontology and KEGG pathway terms using up-regulated genes in BMT.
